# Supplementary material for: Urinary N-acetyl-β-D glucosaminidase as a surrogate marker for renal function in autosomal dominant polycystic kidney disease: 1 year prospective cohort study
Source: PubMed Central journal article supplement (PMC3465238; doi:10.1186/1471-2369-13-93), 2012-08-30

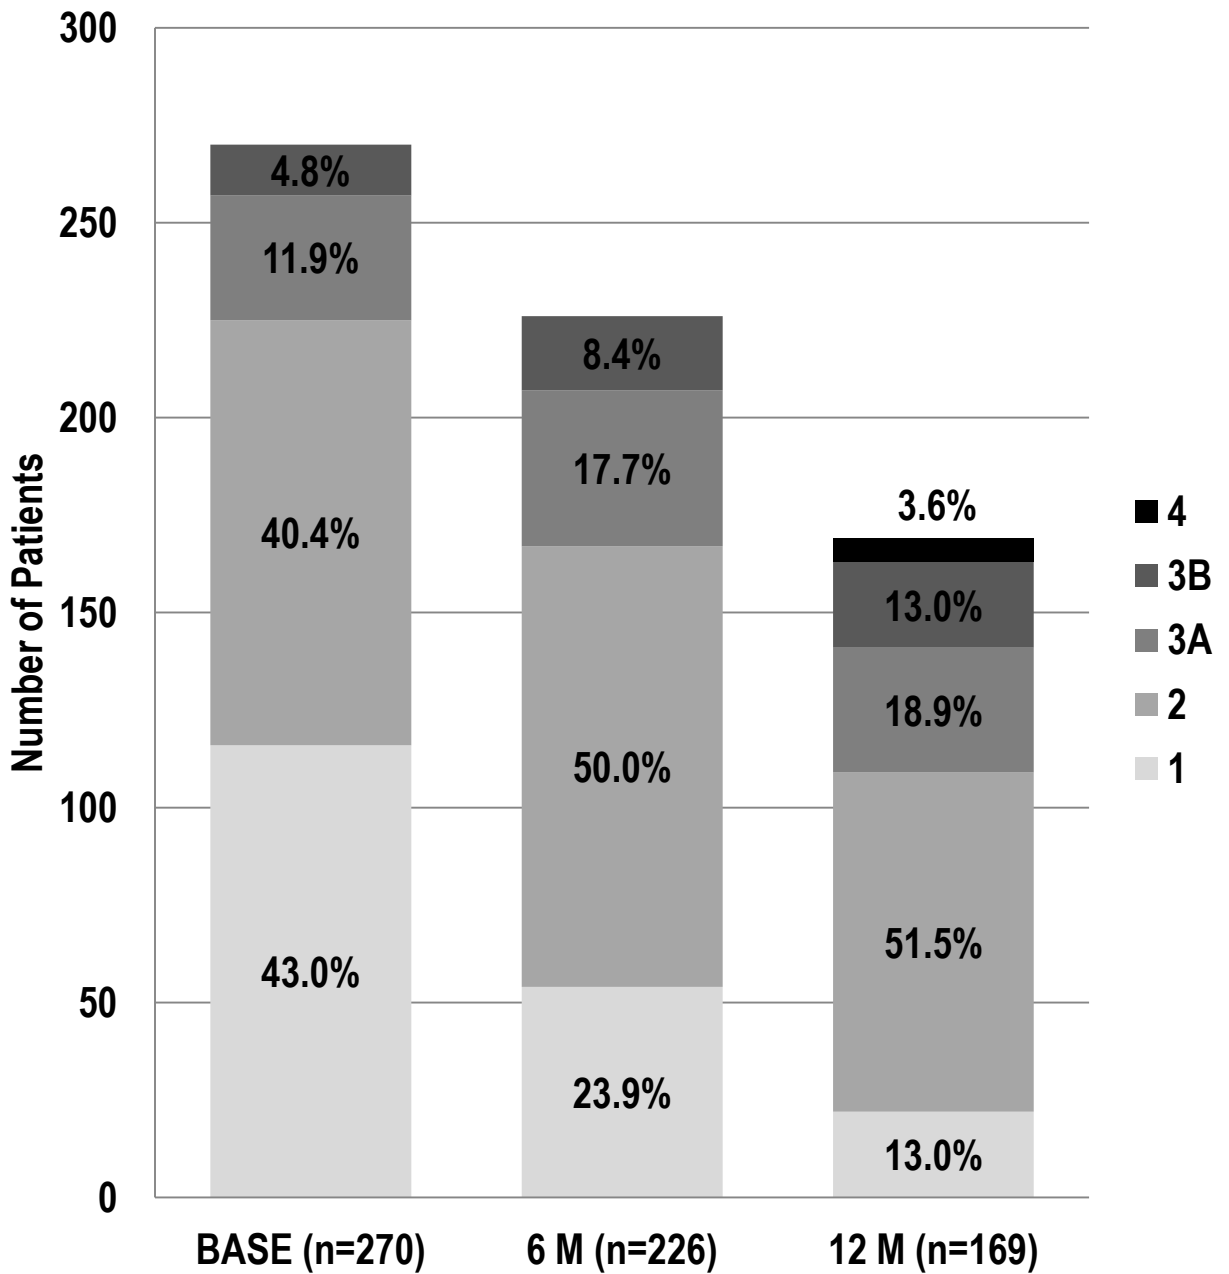

Supplement: 1471-2369-13-93-S1.pdf [file 1471-2369-13-93-S1.pdf]
