# Supplementary material for: Urinary N-acetyl-β-D glucosaminidase as a surrogate marker for renal function in autosomal dominant polycystic kidney disease: 1 year prospective cohort study
Source: PubMed Central journal article supplement (PMC3465238; doi:10.1186/1471-2369-13-93), 2012-08-30
Supplement: 1471-2369-13-93-S4.pdf [file 1471-2369-13-93-S4.pdf]

Baseline  
eGFR

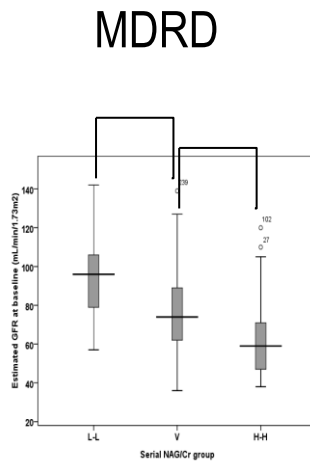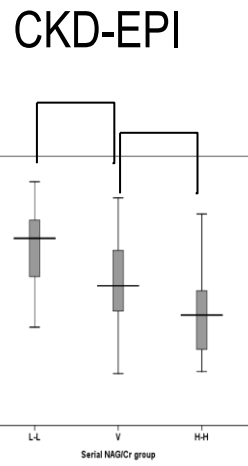

eGFR at  
12M

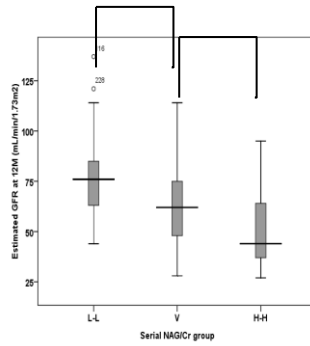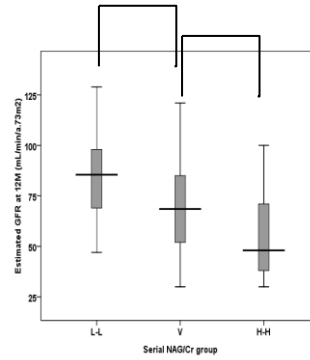

Delta  
eGFR

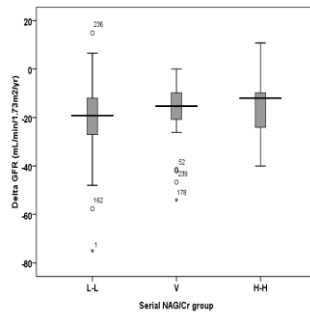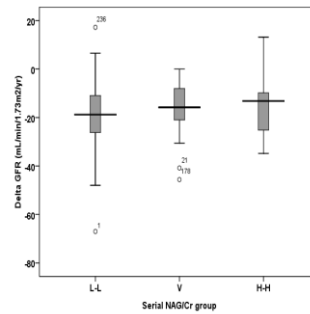

GFR  
Change  
(%) in  
12M

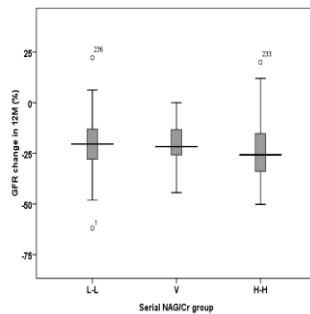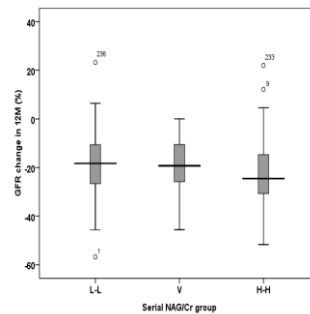

L-L: Low-Low, V: Variable, H-H: High-High  
Low: NAG/Cr < 4.95, High NAG/Cr ≥ 4.95
